# Supplementary material
Source: PubMed Central journal article supplement (PMC3807728)
Supplement: NIHMS55158-supplement-supporting_Info.pdf [file NIHMS55158-supplement-supporting_Info.pdf]

## SUPPLEMENTARY INFORMATION: DATA

**Parasite genotypes.** Clonal *Plasmodium chabaudi* genotypes were isolated from independent infected *Thamnomys rutilans* (thicket rats) caught in different locations in the Central African Republic and Congo-Brazzaville in the late 1960s and early 1970s. To isolate different genotypes, samples from these wild caught infections were diluted to an average of 1 parasite per inoculum and administered to mice, and parasites from the resulting infections stored as frozen stabilites (Beale et al 1978; Mackinnon & Read 1999). These genotypes were confirmed as *P. chabaudi* by morphology (Carter & Walliker 1975) and electrophoretic enzyme analysis used to show they are genetically distinct (Carter 1978). Most of these wild caught infected rodents harboured mixed infections of 2 or 3 *P. chabaudi* genotypes (Carter 1978). These genotypes form part of the WHO Registry of Standard Malaria Parasites, held at The University of Edinburgh, UK.

**Estimating relative male fecundity.** Read et al's (1992) model incorporates limited male fecundity into the classical model of LMC. If a proportion  $z$  of individuals in a mating group are male, and a proportion  $1-z$  are female, then the relative numbers of viable male and female gametes are  $zc$  and  $1-z$  where  $c$  is the relative fecundity of males. The number of ookinetes produced by the mating group is determined by the limiting sex, i.e. it is proportional to  $\min(zc, 1-z)$  and the unbeatable sex ratio ( $z^*$ ) equalises the number of viable male and female gametes,  $z^*c = 1-z^*$ . Our data suggest that this maximum occurs at  $z^* = 0.33$  [0.20, 0.39], and rearranging obtains  $c = 2.03$  [1.56, 4.00].

**Genetic variation in patterns of sex allocation.** In this analysis it was necessary to control for all possible sources of variation to test for an effect of genotype identity, so we fitted infection parameters as covariates and day post infection as a factor. The only infection parameter remaining in the minimal model was the density of parasites, which correlated positively with sex ratio ( $b = 27.35 \times 10^6/\text{ml} \pm 13.41$ ). Because some genotypes appeared to follow the same sex allocation pattern throughout infections we tested which could be grouped together without causing significant change in model deviance. Genotypes DK, CW and CR all followed significantly different sex allocation patterns but AS, AJ and ER could be grouped together ( $\chi^2_{24} = 20.48$ ;  $P = 0.669$ ).

**Table S1:** Analysis of sex ratios produced by six genotypes throughout infections.

| Minimal model                                    | LRT ( $\chi^2$ )       | P        |
|--------------------------------------------------|------------------------|----------|
| Genotype                                         | NA                     |          |
| Day post infection                               | NA                     |          |
| Genotype:day post infection                      | $\chi^2_{55} = 159.55$ | < 0.0001 |
| Parasite density                                 | $\chi^2_1 = 5.25$      | 0.022    |
| Non significant terms deleted from maximal model |                        |          |
| Reticulocyte density                             | $\chi^2_1 = 0.01$      | 0.913    |
| Red blood cell density                           | $\chi^2_1 = 0.15$      | 0.696    |
| Host mass                                        | $\chi^2_1 = 0.53$      | 0.467    |
| Gametocyte density                               | $\chi^2_1 = 1.14$      | 0.286    |

If there is genetic variation for the number of gametes produced by male gametocytes ( $c$ ), this could also explain some of the observed variation in patterns of sex allocation. In this case, Read et al's (1992) model can be used to estimate  $c$  (see above). For example, estimating  $c$  from sex ratios on day 5 post infection gives: CR = 2.39 [1.67, 3.67]; DK = 3.80 [3.40, 4.28]; CW = 7.89 [6.52, 9.86]; and ER, AS, AJ = 12.28 [10.40, 14.90].

**Explaining sex ratio variation throughout infections.** To specifically investigate how infection parameters co-vary with sex ratio across infections we excluded day post infection from the models. Data suggest that sex is determined early in gametocyte development and maturation time of rodent malaria gametocytes is thought to take 24-48hours. If our assays detect mature gametocytes there could be a temporal mismatch of up to 48hours between observed sex ratio and any environmental cues involved. To test for this possibility we ran three analyses in which infection parameters were observed at the same time, 24 hours and 48 hours before sex ratios. The minimal model in which infection parameters were observed 48 hours before sex ratios, explained significantly more deviance than the other two minimal models (log-likelihoods for 0, 24 and 48 hours before: 229.10, 185.69 and 168.50 respectively; LRT for 0 versus 24 hours:  $\chi^2_1 = 86.83$ ;  $P < 0.0001$ ; and 0 versus 48 hours;  $\chi^2_3 = 121.21$ ;  $P < 0.0001$ ).

**Table S2:** Sex ratios vary throughout infections and correlate with infection and host parameters observed 48 hours previously.

| Minimal model                                           | LRT ( $\chi^2$ )   | P        |
|---------------------------------------------------------|--------------------|----------|
| Genotype group                                          | NA                 |          |
| Red blood cell density                                  | NA                 |          |
| Gametocyte density                                      | NA                 |          |
| Parasite density                                        | NA                 |          |
| Genotype group:red blood cell density                   | $\chi^2_3 = 15.86$ | 0.0012   |
| Genotype group:gametocyte density                       | $\chi^2_3 = 22.11$ | < 0.0001 |
| Genotype group:parasite density                         | $\chi^2_3 = 35.35$ | < 0.0001 |
| <b>Non significant terms deleted from maximal model</b> |                    |          |
| Mass                                                    | $\chi^2_1 = 3.26$  | 0.071    |
| Reticulocyte density                                    | $\chi^2_1 = 0.19$  | 0.663    |
| Genotype group:mass                                     | $\chi^2_3 = 0.20$  | 0.977    |
| Genotype group:reticulocyte density                     | $\chi^2_3 = 7.30$  | 0.063    |

**Infection genetic diversity and facultative sex allocation.**

Here, we compared the sex ratios produced by single-genotype infections of each of our six genotypes with those produced by six-genotype infections. It should be noted that in the single infections, genotype DK produced the least female-biased sex allocation pattern. This genotype produces the lowest parasite density of our panel and is a poor competitor (Bell et al 2006), so would not have been disproportionately represented in the six-genotype infections.

**Table S3:** Analysis of sex ratios produced by infections differing in genetic diversity during their growth phase.

| <b>Minimal model</b>                                    | <b>LRT (<math>\chi^2</math>)</b> | <b>P</b> |
|---------------------------------------------------------|----------------------------------|----------|
| Genetic diversity                                       | NA                               |          |
| Day post infection                                      | NA                               |          |
| Genetic diversity:day post infection                    | $\chi^2_2 = 19.93$               | < 0.0001 |
| Gametocyte density                                      | $\chi^2_1 = 11.94$               | < 0.0001 |
| <b>Non significant terms deleted from maximal model</b> |                                  |          |
| Reticulocyte density                                    | $\chi^2_1 = 0.20$                | 0.654    |
| Red blood cell density                                  | $\chi^2_1 = 0.02$                | 0.881    |
| Host mass                                               | $\chi^2_1 = 3.44$                | 0.064    |
| Parasite density                                        | $\chi^2_1 = 1.06$                | 0.304    |

**Facultative sex allocation of focal genotypes.**

**Table S4a:** Sex ratios of focal genotypes in single and two-genotype infections during the growth phase of infections.

| <b>Minimal model</b>                                    | <b>LRT (<math>\chi^2</math>)</b> | <b>P</b> |
|---------------------------------------------------------|----------------------------------|----------|
| Focal genotype                                          | NA                               |          |
| Genetic diversity                                       | NA                               |          |
| Day post infection                                      | NA                               |          |
| Focal:diversity                                         | $\chi^2_2 = 9.98$                | 0.007    |
| Diversity:day                                           | $\chi^2_2 = 12.52$               | 0.002    |
| Focal:day                                               | $\chi^2_4 = 11.27$               | 0.024    |
| <b>Non significant terms deleted from maximal model</b> |                                  |          |
| Reticulocyte density                                    | $\chi^2_1 = 0.94$                | 0.333    |
| Red blood cell density                                  | $\chi^2_1 = 3.47$                | 0.062    |
| Host mass                                               | $\chi^2_1 = 1.03$                | 0.310    |
| Infection parasite density                              | $\chi^2_1 = 0.02$                | 0.886    |
| Infection gametocyte density                            | $\chi^2_1 = 1.03$                | 0.310    |
| Focal parasite density                                  | $\chi^2_1 = 0.27$                | 0.604    |
| Focal gametocyte density                                | $\chi^2_1 = 0.16$                | 0.693    |

**Table S4b:** Sex ratios and proportional representation of focal genotypes during the growth phase of infections.

| <b>Minimal model</b>                                    | <b>LRT (<math>\chi^2</math>)</b> | <b>P</b> |
|---------------------------------------------------------|----------------------------------|----------|
| Focal genotype                                          | NA                               |          |
| Day post infection                                      | NA                               |          |
| Proportion of focal parasites                           | NA                               |          |
| Proportion of focal gametocytes                         | $\chi^2_1 = 16.08$               | < 0.0001 |
| Red blood cell density                                  | $\chi^2_1 = 10.61$               | 0.001    |
| Focal genotype:day                                      | $\chi^2_4 = 21.23$               | < 0.0001 |
| Proportion of focal parasites:focal genotype            | $\chi^2_2 = 10.44$               | 0.005    |
| <b>Non significant terms deleted from maximal model</b> |                                  |          |
| Focal gametocyte density                                | $\chi^2_1 = 0.16$                | 0.876    |
| Focal parasite density                                  | $\chi^2_1 = 0.91$                | 0.339    |

|                                                |                   |       |
|------------------------------------------------|-------------------|-------|
| Infection parasite density                     | $\chi^2_1 = 1.03$ | 0.311 |
| Infection gametocyte density                   | $\chi^2_1 = 0.22$ | 0.642 |
| Reticulocyte density                           | $\chi^2_1 = 0.47$ | 0.493 |
| Host mass                                      | $\chi^2_1 = 0.49$ | 0.486 |
| Proportion of focal gametocytes:focal genotype | $\chi^2_2 = 0.26$ | 0.876 |

**Table S5a:** Sex ratios of focal genotypes in single and two-genotype infections during the post-peak phase of infections.

| <b>Minimal model</b>                                    | <b>LRT (<math>\chi^2</math>)</b> | <b>P</b> |
|---------------------------------------------------------|----------------------------------|----------|
| Focal genotype                                          | NA                               |          |
| Genetic diversity                                       | NA                               |          |
| Day post infection                                      | $\chi^2_4 = 129.14$              | < 0.0001 |
| Focal:diversity                                         | $\chi^2_2 = 27.33$               | < 0.0001 |
| Red blood cell density                                  | $\chi^2_1 = 6.89$                | 0.009    |
| <b>Non significant terms deleted from maximal model</b> |                                  |          |
| Diversity:day                                           | $\chi^2_4 = 5.80$                | 0.215    |
| Focal:day                                               | $\chi^2_{28} = 4.42$             | 0.817    |
| Reticulocyte density                                    | $\chi^2_1 = 3.33$                | 0.068    |
| Host mass                                               | $\chi^2_1 = 0.42$                | 0.515    |
| Infection parasite density                              | $\chi^2_1 = 0.01$                | 0.922    |
| Infection gametocyte density                            | $\chi^2_1 = 1.59$                | 0.208    |
| Focal parasite density                                  | $\chi^2_1 = 0.70$                | 0.401    |
| Focal gametocyte density                                | $\chi^2_1 = 0.37$                | 0.543    |

**Table S5b:** Sex ratios and proportional representation of focal genotypes during the post-peak phase of infections.

| <b>Minimal model</b>                                    | <b>LRT (<math>\chi^2</math>)</b> | <b>P</b> |
|---------------------------------------------------------|----------------------------------|----------|
| Focal genotype                                          | $\chi^2_2 = 24.83$               | < 0.0001 |
| Day post infection                                      | $\chi^2_4 = 47.92$               | < 0.0001 |
| Red blood cell density                                  | $\chi^2_1 = 10.04$               | 0.002    |
| <b>Non significant terms deleted from maximal model</b> |                                  |          |
| Host mass                                               | $\chi^2_1 = 0.15$                | 0.695    |
| Reticulocyte density                                    | $\chi^2_1 = 2.84$                | 0.092    |
| Infection parasite density                              | $\chi^2_1 = 0.23$                | 0.632    |
| Infection gametocyte density                            | $\chi^2_1 = 0.16$                | 0.685    |
| Focal gametocyte density                                | $\chi^2_1 = 3.01$                | 0.083    |
| Focal parasite density                                  | $\chi^2_1 = 2.51$                | 0.113    |
| Proportion of focal parasites                           | $\chi^2_1 = 2.85$                | 0.091    |
| Proportion of focal gametocytes                         | $\chi^2_1 = 2.68$                | 0.102    |
| Focal genotype:day                                      | $\chi^2_8 = 13.12$               | 0.108    |
| Proportion of focal parasites:focal genotype            | $\chi^2_2 = 1.44$                | 0.486    |
| Proportion of focal gametocytes:focal genotype          | $\chi^2_2 = 3.00$                | 0.223    |

## References.

- Beale, G.H., Carter, R. and Walliker D. (1978) Genetics. Pages 213–245 in R. Killick Kendrick and W. Peters, eds. Rodent malaria. Academic Press, London.
- Bell, A.S., *et al.* (2006) Within-host competition in genetically diverse malaria infections: Parasite virulence and competitive success. *Evolution* 60, 1358-1371
- Carter, R. (1978) Studies on enzyme variation in murine malaria parasites *Plasmodium-berghei*, *P-yoelii*, *Plasmodium-vinckei* and *Plasmodium-chabaudi* by Starch-Gel Electrophoresis. *Parasitology* 76, 241-267
- Carter, R. and Walliker, D. (1975) New observations on the malaria parasites of rodents of the Central African Republic—*Plasmodium vinckei* petted subsp. nov. and *Plasmodium chabaudi* Landau, 1965, *Ann. Trop. Med. Parasitol.* 69, 187–196.
- Mackinnon, M.J., and Read, A.F. (1999) Genetic relationships between parasite virulence and transmission in the rodent malaria *Plasmodium chabaudi*. *Evolution* 53, 689-703
- Read, A.F. *et al.* Gametocyte sex-ratios as indirect measures of outcrossing rates in malaria. *Parasitology* 104, 387-395 (1992).
